# Supplementary material for: Artemisinin analogue SM934 attenuate collagen-induced arthritis by suppressing T follicular helper cells and T helper 17 cells
Source: PubMed Central journal article supplement (PMC5126690; doi:10.1038/srep38115), 2016-11-29
Supplement: srep38115-s2.pdf [file srep38115-s2.pdf]

**Title: Artemisinin analogue SM934 attenuate collagen-induced arthritis by suppressing T follicular helper cells and T helper 17 cells**

Authors:

Ze-Min Lin <sup>a,b</sup>, Xiao-Qian Yang<sup>b</sup>, Feng-Hua Zhu<sup>b</sup>, Shi-Jun He<sup>b</sup>, Wei Tang<sup>b</sup> & Jian-Ping Zuo <sup>a, b</sup>.

<sup>a</sup> Laboratory of Immunology and Virology, Shanghai University of Traditional Chinese Medicine, Shanghai 201203, People's Republic of China. <sup>b</sup>Laboratory of Immunopharmacology, Shanghai Institute of Materia Medica, Chinese Academy of Sciences, Shanghai 201203, People's Republic of China. Correspondence and requests for materials should be addressed to J.-P. Z. (email: [jpzuo@simm.ac.cn](mailto:jpzuo@simm.ac.cn)) or W.T. (email: [tangwei@simm.ac.cn](mailto:tangwei@simm.ac.cn)) or S.-J.H. (email: [heshijun@simm.ac.cn](mailto:heshijun@simm.ac.cn))

**Full-length blots of Figure 6C:**

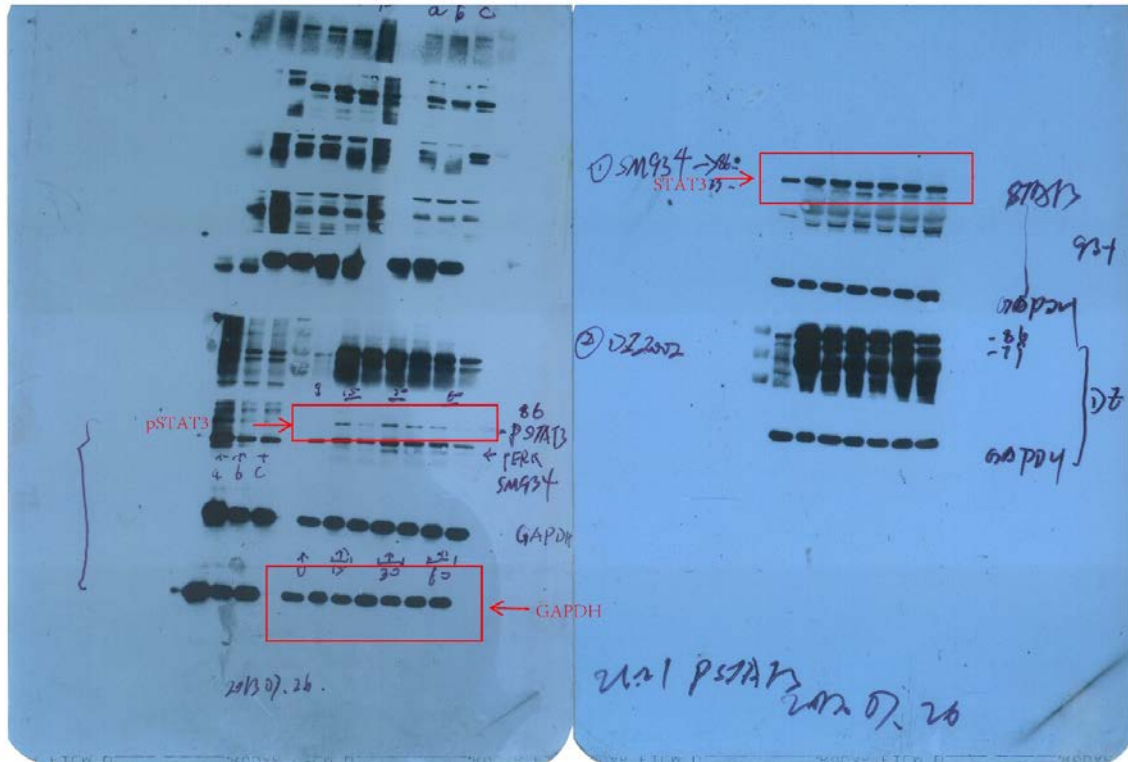

The boxes indicating the blots we used in Figure 6C, and arrows pointing to the specific proteins.
